# Supplementary material
Source: Springer Nature journal article supplement (https://www.springermedizin.de/resource/supplementary/13550_2012_80_MOESM1_ESM.pdf/9687506)

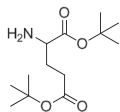

**1**

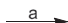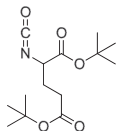

**2**

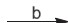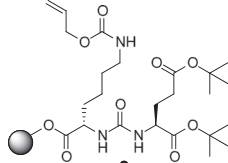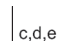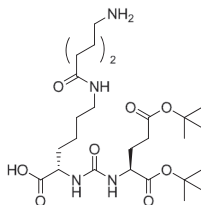

**5**

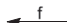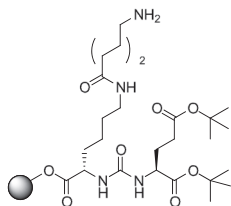

**4**

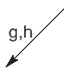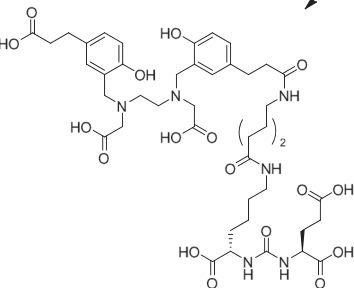

**6**

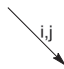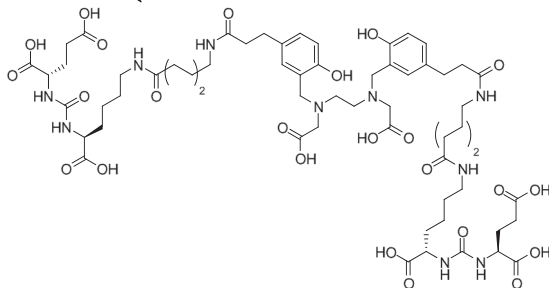

**7**

Supplement: MOESM1 [file 9687506]
